# Supplementary material for: Rhynchosia volubilis Promotes Cell Survival via cAMP-PKA/ERK-CREB Pathway
Source: MDPI journal article supplement (doi:10.3390/ph15010073), 2022-01-06
Supplement: s1 [file s1]

## Supplementary Material

### ***Rhynchosia volubilis* promotes cell survival via cAMP-PKA/ERK-CREB pathway**

Sang-Hyun Ahn<sup>1</sup>, Jung-Soo Suh<sup>1</sup>, Yoon-Kwan Jang<sup>1</sup>, Heon-Su Kim<sup>1</sup>, Gyu-ho Choi<sup>1</sup>,

Eunhye Kim<sup>1</sup> and Tae-Jin Kim<sup>1,2,3\*</sup>

<sup>1</sup>Department of Integrated Biological Science

<sup>2</sup>Department of Biological Sciences

<sup>3</sup>Institute of Systems Biology, Pusan National University, Pusan 46241, Republic of Korea,

\*To whom correspondence should be addressed:

Tae-Jin Kim, Ph.D.

Email: [tjkim77@pusan.ac.kr](mailto:tjkim77@pusan.ac.kr)

Tel: 82-051-510-2261

**Figure S1**

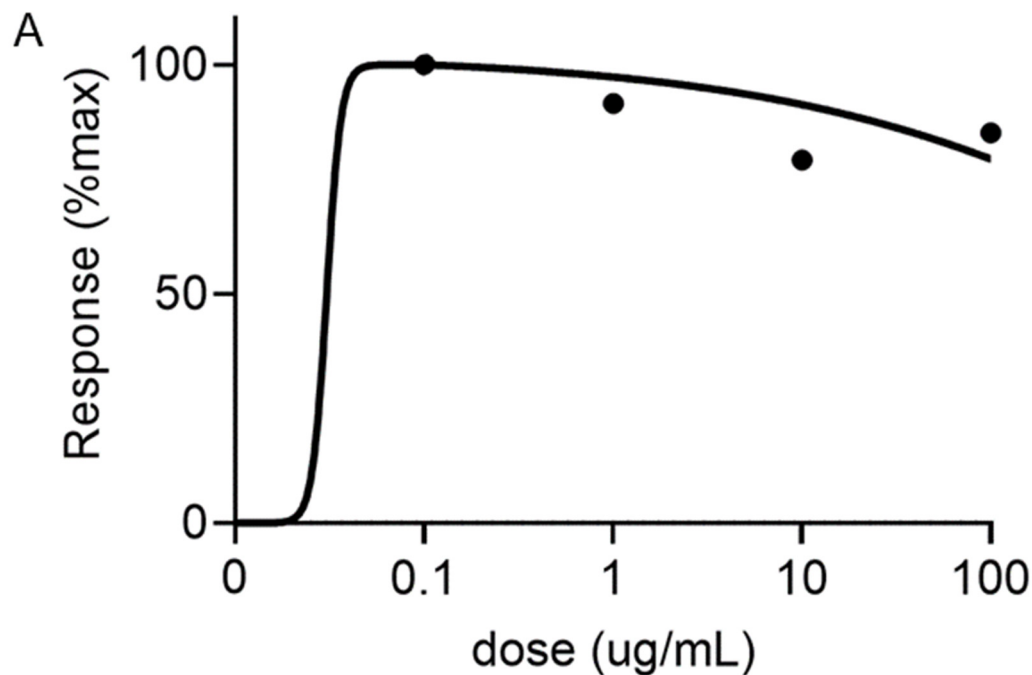

**Figure S1.** Dose-response curve of HeLa cell viability according to the concentration of ethanol extract of *Rhynchosia Volubilis* (EERV). Viability of HeLa cells exposed to the control (0.5% (v/v) DMSO(Biosesang)) and EERV (0.1, 1, 10, and 100  $\mu\text{g/mL}$ ) for 24 h, as measured using viability assays. The data in Figure 1B was used; the cell viability data of each point was replaced with the response value(%max) and is shown by normalizing the maximum value to 100% and the control value to 0% ( $\text{EC}_{50}=0.05$ ) ( $n = 6$ ). The absorbance values of solubilized formazan product were measured using the Glomax Multi+Microplate Multi Reader (9301-010, Promega, USA). The graph was generated with GraphPad Prism 7.0 (San Diego, CA).
